# Supplementary material
Source: HighWire-hosted journal article supplement (http://cmajopen.ca/highwire/filestream/80886/field_highwire_adjunct_files/1/open-2015-0142-2-at.pdf)
Supplement: open-2015-0142-2-at.pdf [file open-2015-0142-2-at.pdf]

Appendix 2 (as supplied by the authors): Final Coding Tree

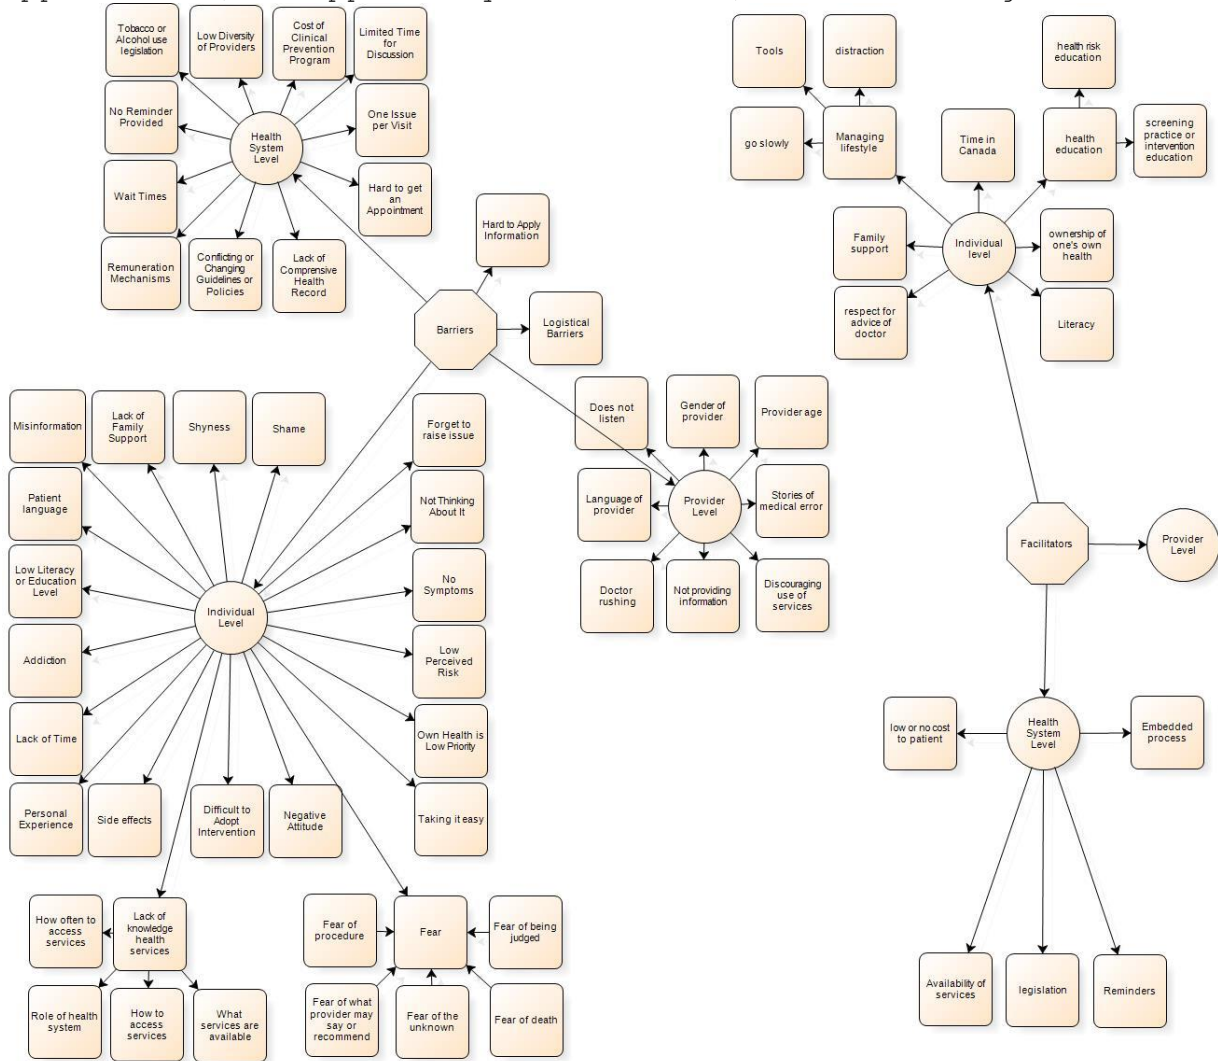

Appendix to: Majid S, Douglas R, Lee V, et al. Facilitators of and barriers to accessing clinical prevention services for the South Asian population in Surrey, British Columbia: a qualitative study. *CMAJ Open* 2016. DOI:10.9778/cmajo.20150142
